# Supplementary material for: Langmuir–Blodgett assembly of bent-shaped rigid amphiphiles into spiral rings
Source: Royal Society of Chemistry journal article supplement (doi:10.1039/c0sm00403k), 2010-09-23
Supplement: c0sm00403k.pdf [file c0sm00403k.pdf]

## Supporting Information

### **Langmuir-Blodgett Assembly of Bent-Shaped Rigid Amphiphiles into Spiral Rings**

Libin Liu, Ho-Joong Kim and Myongsoo Lee\*

*Center for Supramolecular Nano-Assembly, Department of Chemistry,  
Seoul National University, Seoul 151-742, Korea*

To whom correspondence should be addressed. Email: [myongslee@snu.ac.kr](mailto:myongslee@snu.ac.kr)

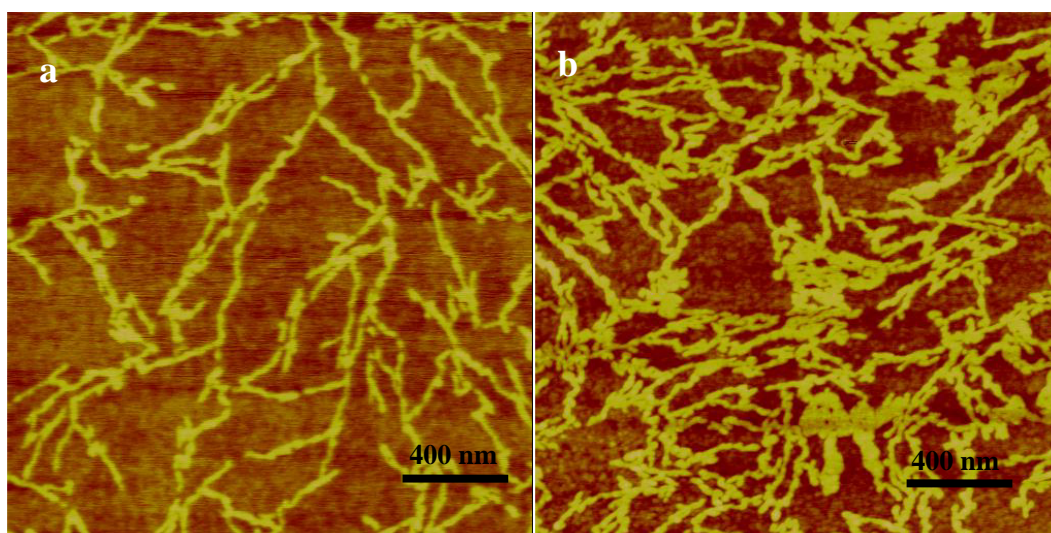

**Fig. S1** AFM images the LB film of **1** deposited at the surface pressure of (a) 0.5 mN/m and (b) 5 mN/m.

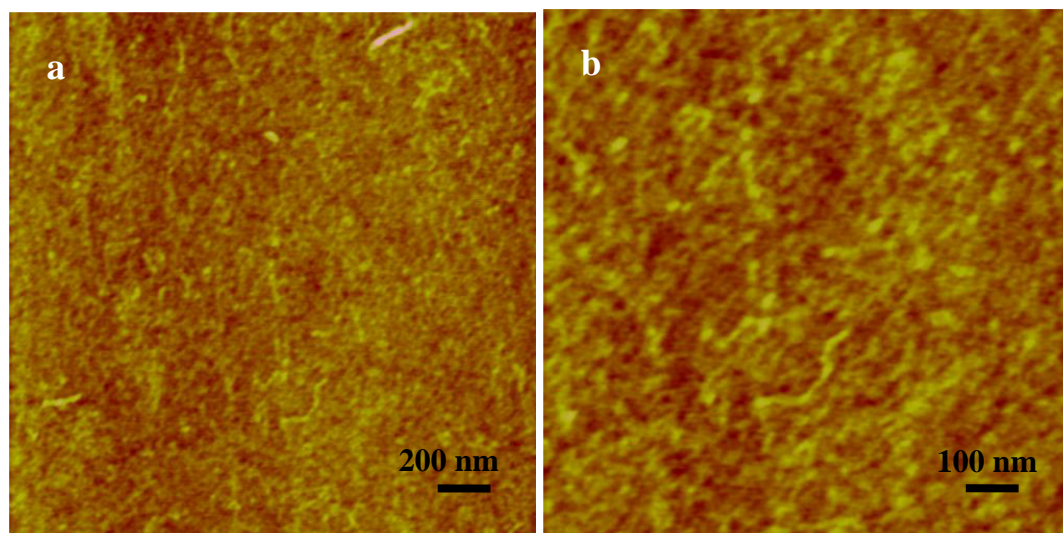

**Fig. S2** AFM images of the LB films of **2** deposited at the onset of the surface pressure ( $\pi < 0.02$  mN/m), (a)  $2 \times 2 \mu\text{m}^2$  and (b)  $1 \times 1 \mu\text{m}^2$  scan, respectively.

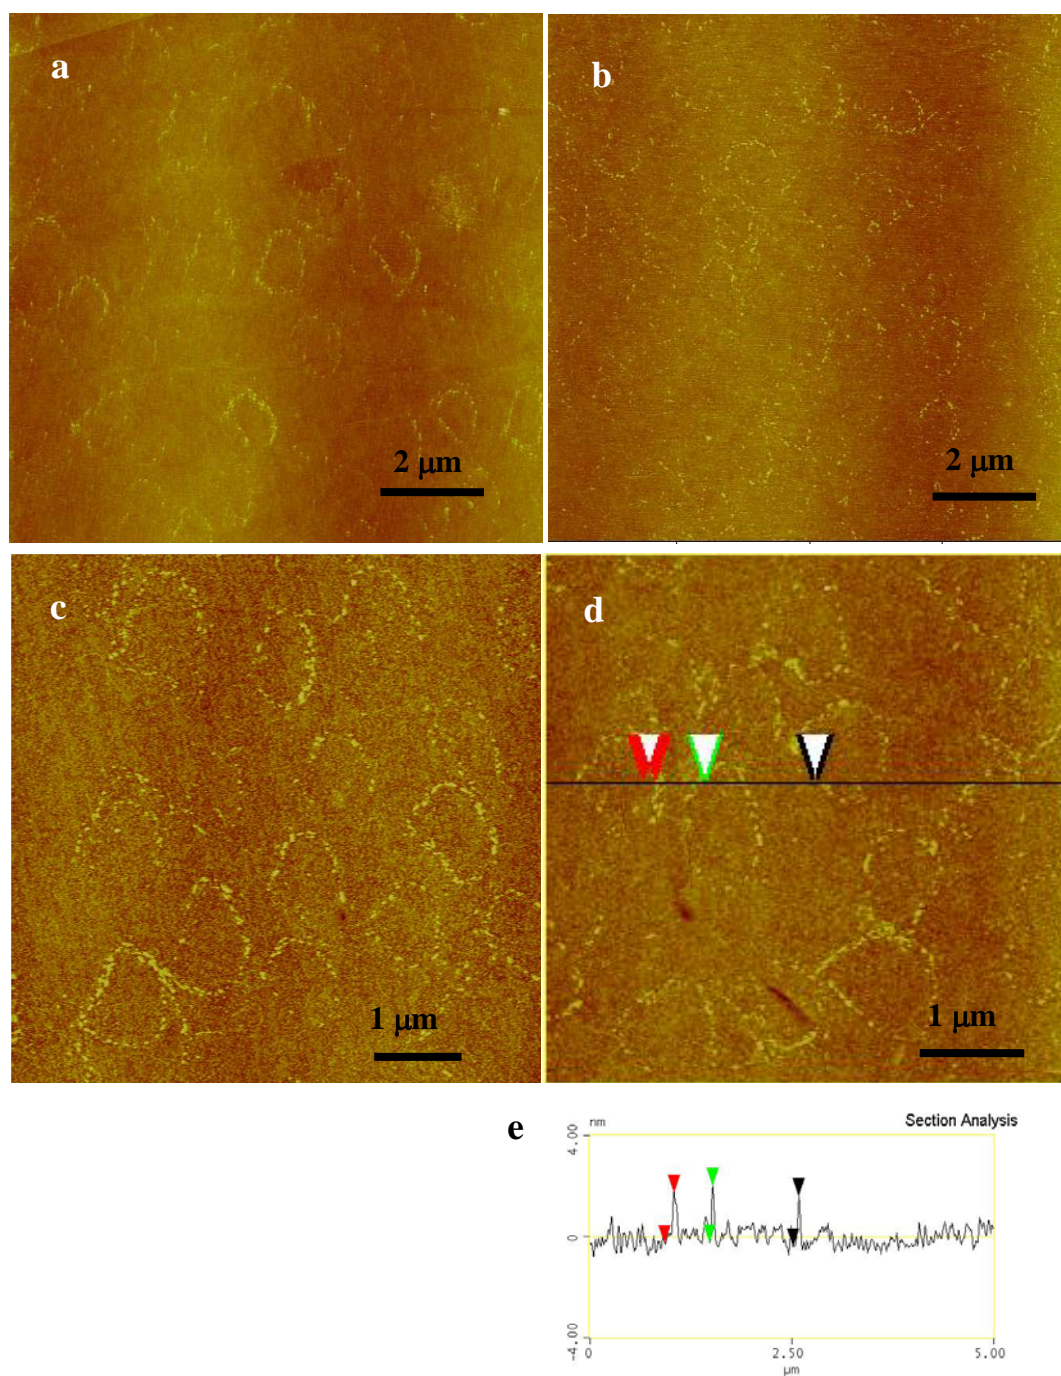

**Fig. S3** AFM images of the LB films of **2** deposited at the surface pressure of 0.5 mN/m. The images were obtained by scan different area of the silicon wafer.

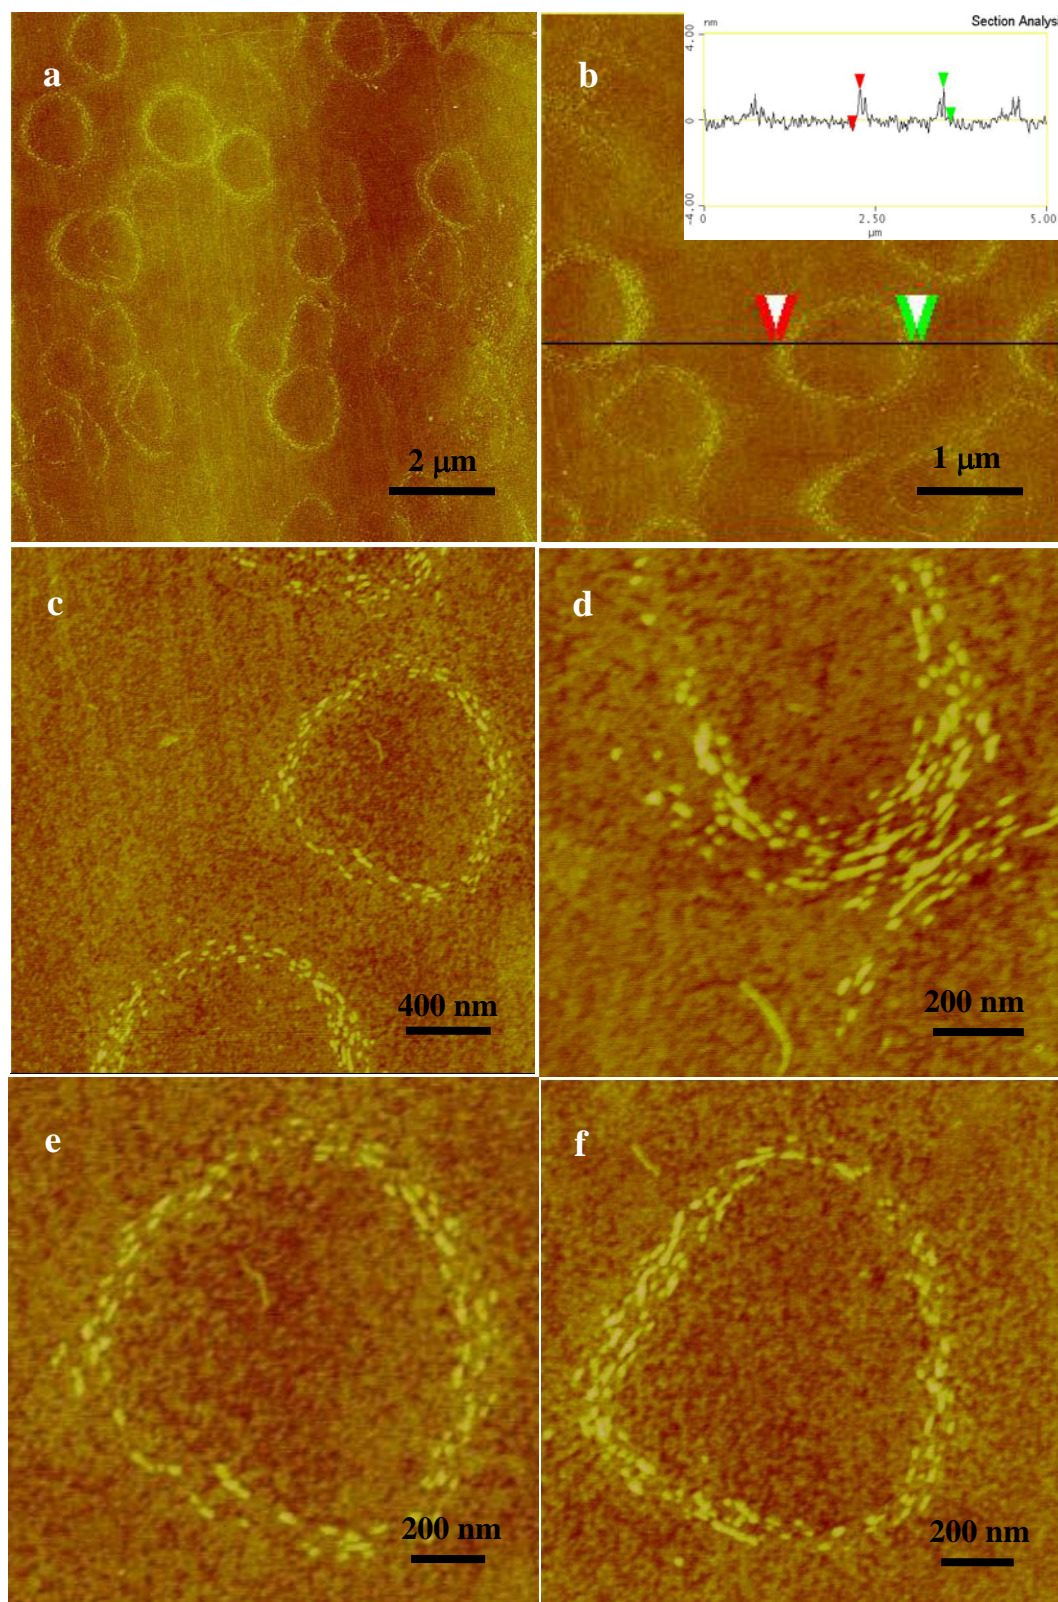

**Fig. S4** AFM images of the LB films of **2** deposited at the surface pressure of 2 mN/m. (a) and (b) are different area of the silicon wafer; (c), (d), (e) and (f) are high resolution images.

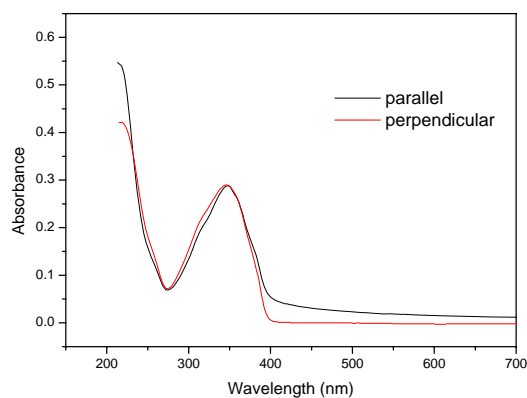

**Fig. S5** Electronic spectrum in polarized light of the LB film of **2**: (black line) electric field vector parallel to the incidence plane; (red line) electric field vector perpendicular to the incidence plane.

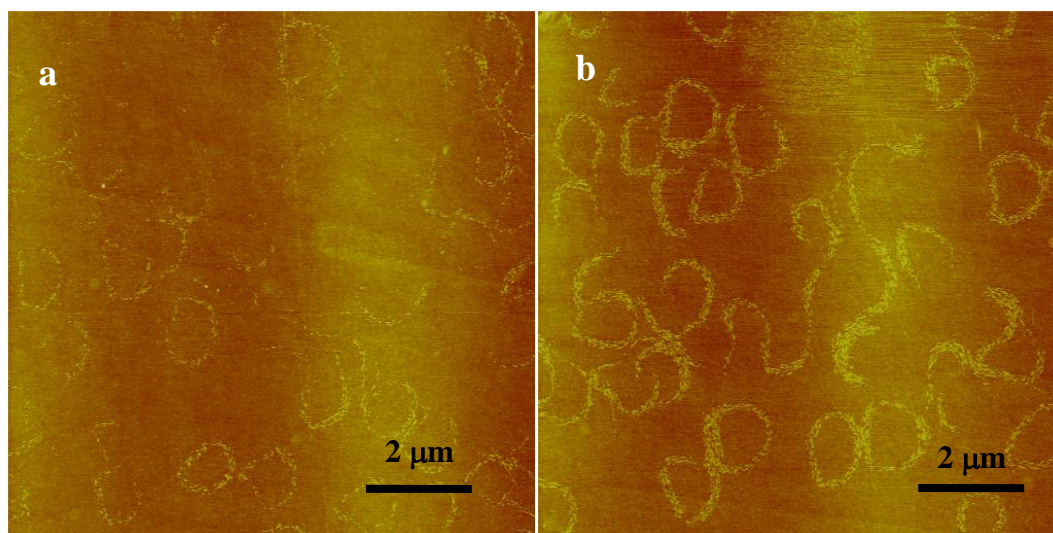

**Fig. S6** AFM images of the LB films of **2** deposited at the rate of 40 mm/min, (a) at  $\pi = 1$  mN/m and (b)  $\pi = 3$  mN/m, respectively.

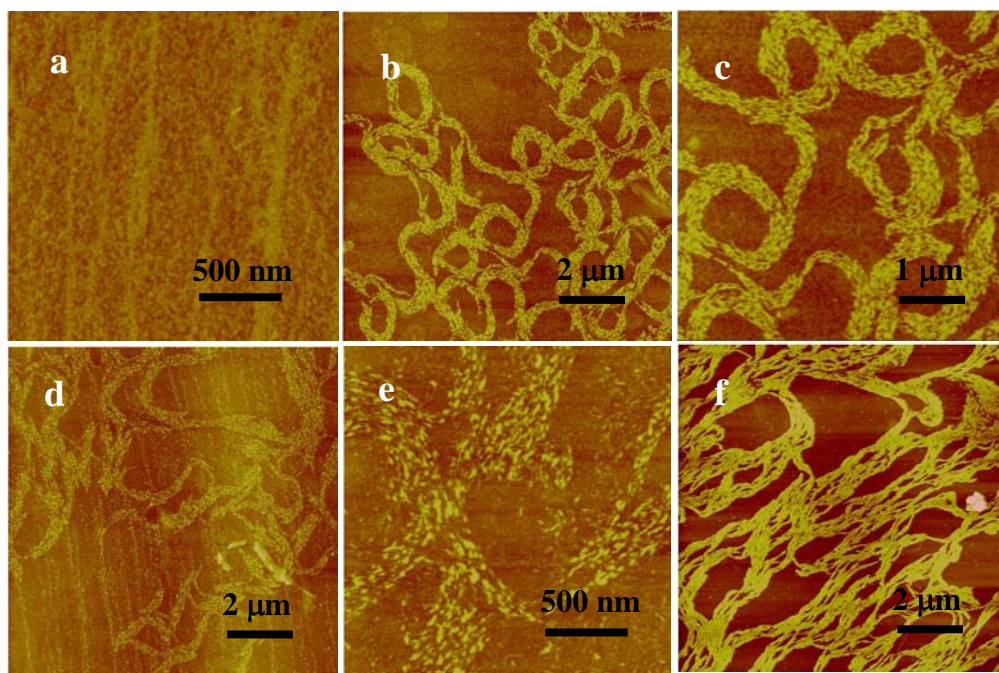

**Fig. S7** AFM images of **3** deposited at the surface pressure of (a) 1 mN/m, (b) and (c) 5 mN/m, (d) and (e) 10 mN/m, (f) 20 mN/m, respectively.
